# Supplementary material for: Orange-Peel-Derived Nanobiochar for Targeted Cancer Therapy
Source: MDPI journal article supplement (doi:10.3390/pharmaceutics14102249), 2022-10-21
Supplement: s1 [file s1]

## ***Electronic Supplementary Information***

*to*

### **Orange peel derived nanobiochar for targeted cancer therapy**

Daniela Iannazzo,<sup>1\*</sup> Consuelo Celesti,<sup>1,2\*</sup> Claudia Espro,<sup>1</sup> Angelo Ferlazzo,<sup>1</sup> Salvatore V. Giofrè,<sup>3</sup> Mario Scuderi,<sup>4</sup> Silvia Scalese,<sup>4</sup> Bartolo Gabriele,<sup>5</sup> Raffaella Mancuso,<sup>5</sup> Ida Zicarelli,<sup>5</sup> Giuseppa Visalli,<sup>6</sup> Angela Di Pietro<sup>6</sup>

<sup>1</sup> *Department of Engineering, University of Messina, Contrada Di Dio, I-98166 Messina, Italy;*

<sup>2</sup> *Department of Clinical and Experimental Medicine, University of Messina, Via Consolare Valeria, I-98125 Messina, Italy*

<sup>3</sup> *Department of Chemical, Biological, Pharmaceutical and Environmental Sciences, University of Messina, Viale F. Stagno d'Alcontres, 98166 Messina, Italy*

<sup>4</sup> *Institute for Microelectronics and Microsystems, National Research Council (CNR-IMM), Ottava Strada n.5, I-95121 Catania, Italy*

<sup>5</sup> *Laboratory of Industrial and Synthetic Organic Chemistry (LISOC), Department of Chemistry and Chemical Technologies, University of Calabria, Via Pietro Bucci 12/C, 87036 Arcavacata di Rende (CS), Italy*

<sup>6</sup> *Department of Biomedical and Dental Sciences and Morphological and Functional Images, University Hospital of Messina, Via Consolare Valeria, 1, 98100 Messina, Italy*

*\*Correspondence: diannazzo@unime.it; ccelesti@unime.it*

## **Contents**

**Figure S1.** Representative CLSM image of A549 cells treated for 24 h with NBC-B.....S2

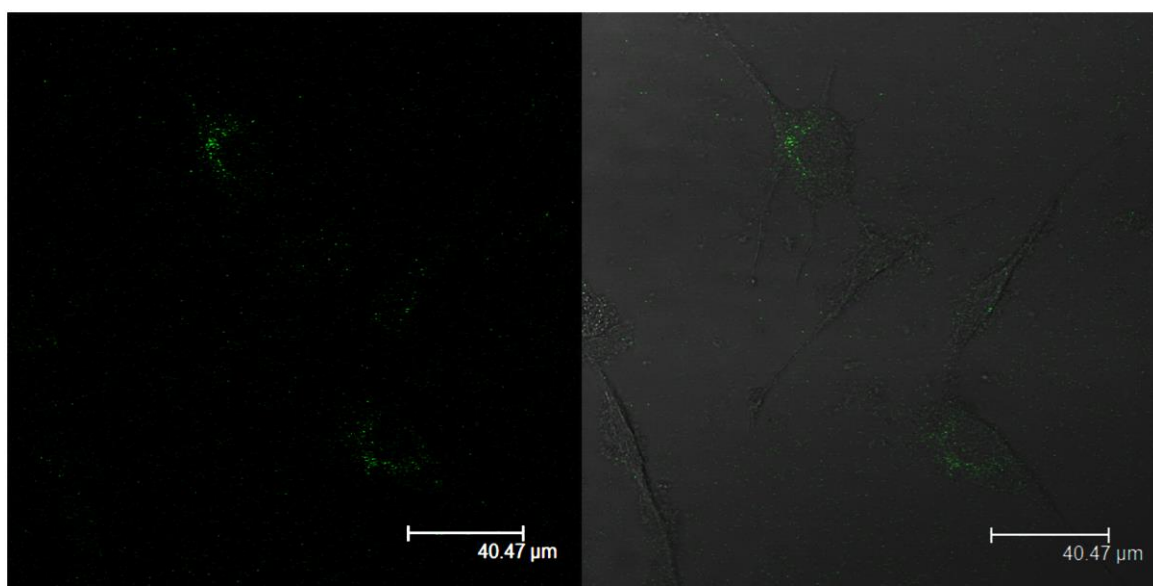

**Figure S1.** Representative CLSM image of A549 cells treated for 24 h with NBC-B to assess the cell uptake.
